# Supplementary material for: Hybrid hydrogel films with graphene oxide for continuous saliva-level monitoring
Source: Royal Society of Chemistry journal article supplement (doi:10.1039/d0tc00725k), 2020-01-01
Supplement: d0tc00725k1.pdf [file d0tc00725k1.pdf]

## Supplementary Information

### Hybrid hydrogel film with phenylboronic acid-containing graphene oxide for continuous saliva-level monitoring

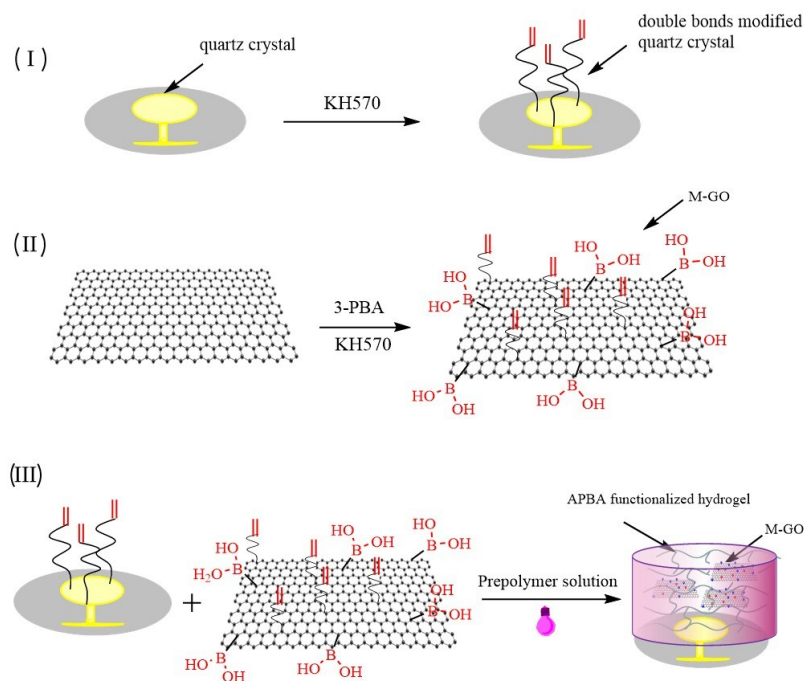

Figure S1. Procedure for the synthesis of hybrid hydrogel film

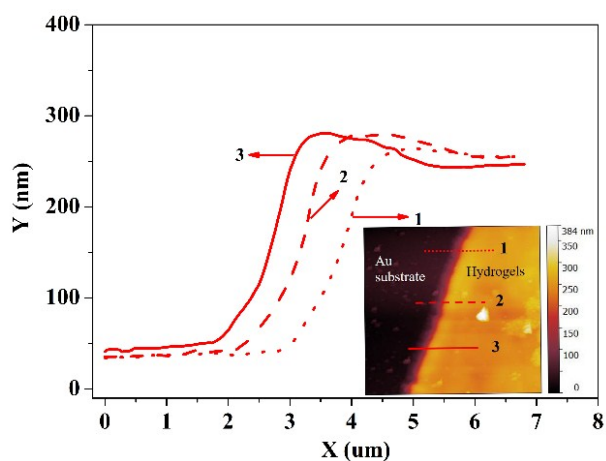

Figure S2. The thickness of hydrogel film

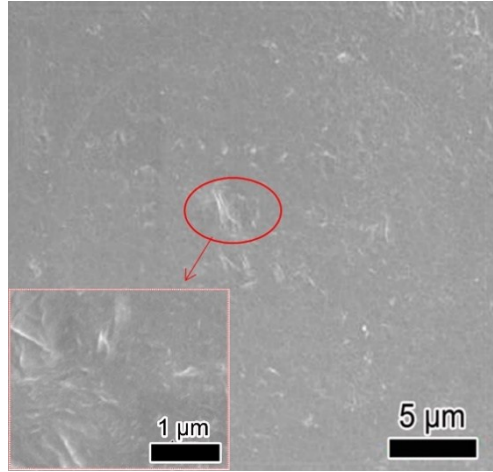

Figure S3. SEM image hybrid hydrogel film-0.6%

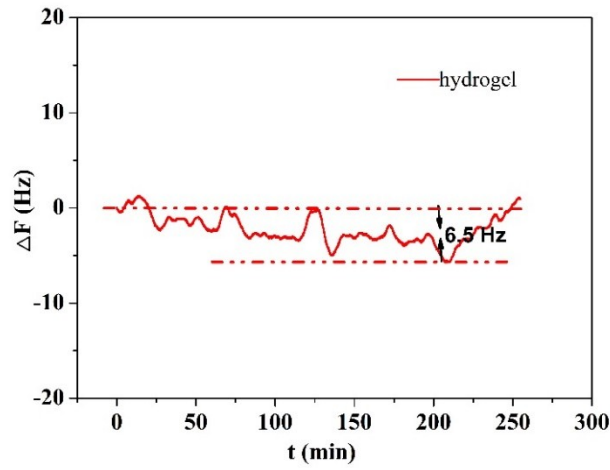

Figure S4. the stability of hydrogel film coated on QCM chip

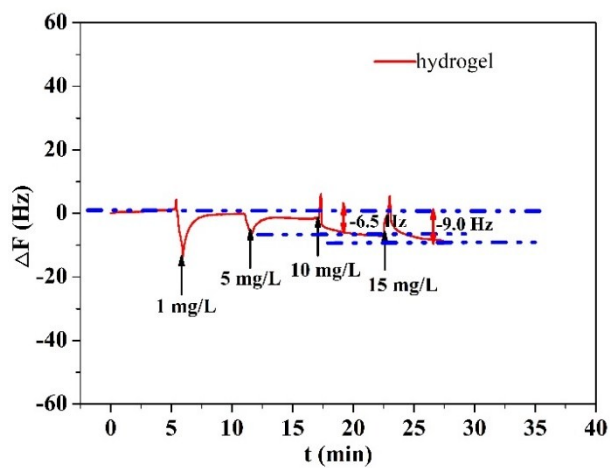

Figure S5. The low detection limit of hydrogel coated on QCM chip

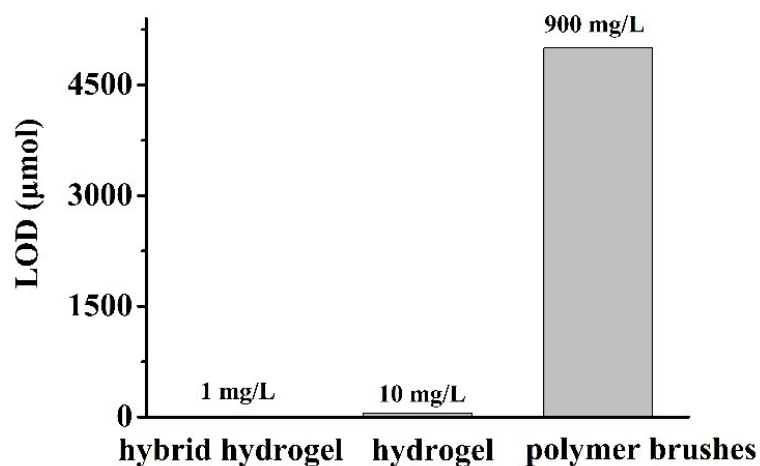

Figure S6. The LOD of the hybrid hydrogel, hydrogel, and polymer brushes

Table S1. The % RSD of hydrogel and hybrid hydrogel-coated QCM sensor after nine association–dissociation cycles.

| Film            | Mean of glucose response (Hz) | Standard deviations | % RSD |
|-----------------|-------------------------------|---------------------|-------|
| Hydrogel        | 10.48                         | 0.484               | 4.6%  |
| Hybrid hydrogel | 15.04                         | 0.384               | 2.6%  |

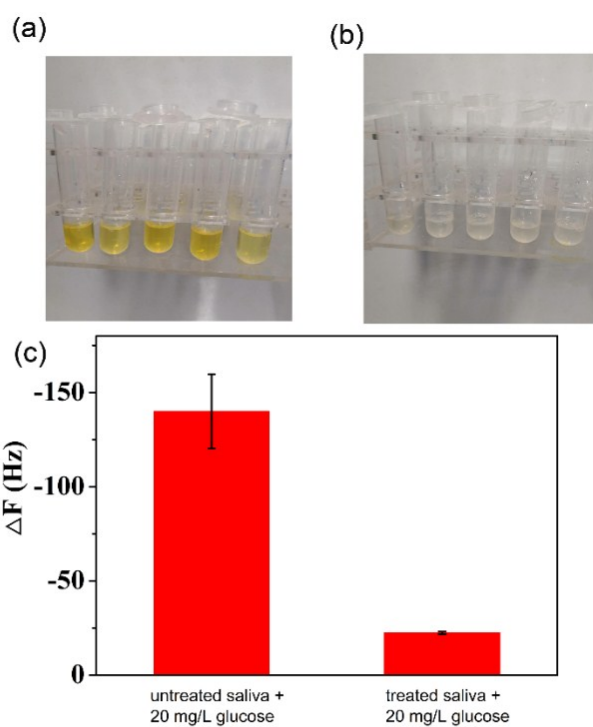

Figure S7. (a) The untreated saliva, (b) The treated saliva, and (c) Response of hybrid hydrogel-coated QCM sensor to 20 mg/L glucose in human saliva

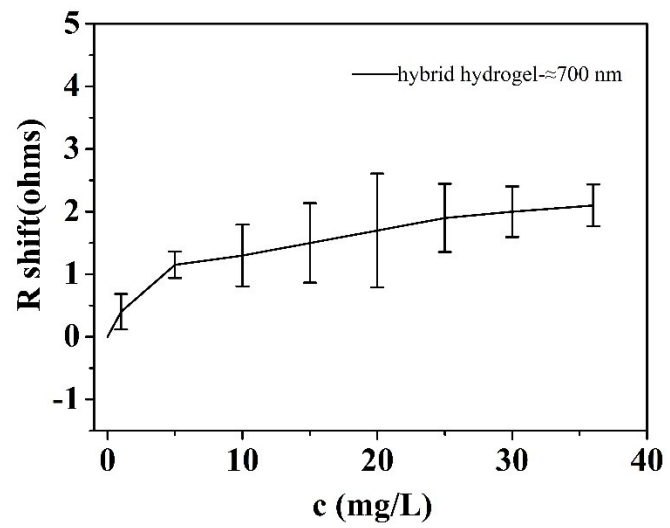

Figure S8. The R shift of hybrid hydrogel vs 0–36 mg L<sup>-1</sup> glucose level at thickness of 700 nm.
